# Supplementary material for: Developmental and Evolutionary Perspectives on the Origin and Diversification of Arthropod Appendages
Source: Oxford University Press journal article supplement (doi:10.1093/icb/icx063), 2017-05-28
Supplement: icx063_Supp.pdf [file icx063_Supp.pdf]

Supplemental Material for  
Developmental and Evolutionary Perspectives on the Origin and Diversification of Arthropod  
Appendages

Elizabeth L. Jockusch

[Publication information here]

**Supplemental Table 1:** References related to expression and function of candidate genes for joint formation from select arthropod lineages, supporting attributions in Figure 3.

Scoring a gene as giving evidence for conservation of a joint formation role based on expression or function in Figure 3 required that the expression/functional evidence be similar across most joints within the legs of the focal lineages. Because much of the functional data is from RNAi and because expression studies may not include all relevant stages, negative results should be regarded cautiously.

**Supplemental Table 1:** References for information presented in Figure 3. exp=expression; fcn=function.

|                                                                           | <i>Notch</i>                             |                  | <i>Delta</i>         |                       | <i>Ser</i> |         | <i>nub/pdm</i>                               |                      | <i>odd family<sup>a</sup></i> |             | <i>dpp</i>                  |          | <i>EGF<sup>b</sup></i> |         | <i>tal</i>        |                   | <i>dve</i> |         | <i>dAP-2</i>   |                   |
|---------------------------------------------------------------------------|------------------------------------------|------------------|----------------------|-----------------------|------------|---------|----------------------------------------------|----------------------|-------------------------------|-------------|-----------------------------|----------|------------------------|---------|-------------------|-------------------|------------|---------|----------------|-------------------|
|                                                                           | exp                                      | fcn              | exp                  | fcn                   | exp        | fcn     | exp                                          | fcn                  | exp                           | fcn         | exp                         | fcn      | exp                    | fcn     | exp               | fcn               | exp        | fcn     | exp            | fcn               |
| <b><i>Drosophila</i></b>                                                  | (1–4)                                    | (1–3, 5)         | (1–3, 6)             | (1–3)                 | (1–3, 6)   | (1–3)   | (3, 7–9)                                     | (9)                  | (3, 7, 8, 10–12)              | (8, 10, 12) | (13)                        | (13)     | (14)                   | (14)    | (15)              | (15)              | (4, 16)    | (4, 16) | (8, 11, 16–18) | (11, 16–18)       |
| <b><i>Tribolium</i></b><br>(embryogenesis)                                |                                          |                  | (19) <sup>c</sup>    |                       | (20–22)    | (21)    |                                              |                      | (23)                          |             | (24, 25)                    | (25)     | (26)                   | (26)    | (27) <sup>d</sup> | (27)              |            |         |                |                   |
| <b><i>Tribolium</i></b><br>(metamorphosis)                                |                                          | (28–30)          |                      | (28, 29) <sup>e</sup> |            | (28–30) |                                              | (28–30) <sup>f</sup> |                               | (28–30)     |                             | (28, 31) |                        | (28–30) |                   |                   |            |         |                | (32) <sup>g</sup> |
| <b>Orthoptera</b> ( <i>Gryllus</i><br>unless footnoted)                   | (33)                                     | (33)             | (33)                 | (33, 34)              |            |         | (9) <sup>h</sup>                             | (9) <sup>i</sup>     |                               |             | (35) <sup>j</sup> ,<br>(36) |          | (33, 37)               |         |                   | (38) <sup>k</sup> |            |         |                |                   |
| <b><i>Periplaneta</i></b>                                                 | (38)                                     | (9) <sup>l</sup> | (38)                 |                       |            |         | (9, 38, 39)                                  | (9, 38) <sup>m</sup> |                               |             |                             |          |                        |         | (38)              | (38)              |            |         |                |                   |
| <b>crustaceans</b>                                                        |                                          |                  |                      |                       |            |         | (40, 41) <sup>n</sup> ,<br>(42) <sup>o</sup> |                      |                               |             |                             |          |                        |         |                   |                   |            |         |                |                   |
| <b>myriapods</b>                                                          | (43) <sup>p</sup> :<br>(44) <sup>q</sup> |                  | (43)<br>(44)         |                       |            |         |                                              |                      |                               |             | (45)                        |          | (46) <sup>r</sup>      |         |                   |                   |            |         |                |                   |
| <b>chelicerates</b><br>( <i>Cupiennius</i> unless<br>otherwise specified) | (47, 48)                                 | (48)             | (47) <sup>s</sup>    |                       | (48)       | (48)    | (41, 48)                                     |                      | (48)                          |             | (49)                        |          |                        |         |                   |                   |            |         | (48, 50)       | (48)              |
| <b>Onychophora</b><br>( <i>Euperipatoides</i> )                           | (51–53) <sup>u</sup>                     |                  | (51–53) <sup>v</sup> |                       | (53)       |         |                                              |                      | (54)                          |             | (55, 56)                    |          |                        |         |                   |                   |            |         |                |                   |

<sup>a</sup> Combines information from all paralogs in the *odd-skipped* family (called *odd*, *bowl*, *sob* and *drm* in *Drosophila*)

<sup>b</sup> Combines information from both receptors and ligands for the EGF signaling pathway

<sup>c</sup> See Supplemental Figure S4 in cited source

<sup>d</sup> The *Tribolium* homologue of *tarsal-less* is called *mille-patte*.

<sup>e</sup> Substantial knockdown of *Dl* expression was achieved; despite this, a joint loss phenotype was observed in only a very small number of specimens.

<sup>f</sup> negative result for legs

<sup>g</sup> Linz and Tomoyasu (2015) report premetamorphic lethality in response to *tal* RNAi, precluding analysis of joint formation phenotypes.

<sup>h</sup> *Acheta*

<sup>i</sup> *Acheta*; only a single joint (tibia-tarsus) was lost in RNAi phenotypes.

<sup>j</sup> *Schistocerca*

<sup>k</sup> Chesebro suggests that the absence of widespread joint phenotypes may reflect redundancy of *tal* function, rather than absence.

<sup>l</sup> *Notch* RNAi leads to loss of *nub* expression proximal to joints, but later morphological stages (confirming loss of joints) were not shown, so this was treated as no data in Figure 3

<sup>m</sup> Two leg joints are affected in RNAi phenotypes, suggesting a specific role in a few joints, rather than a general joint formation role. In the antenna, most joints are lost in the strongest phenotypes, suggesting a broader role in this appendage type.

<sup>n</sup> *Pastifastacus* (a crayfish) shows expression in one ring per segment

<sup>o</sup> *Porcellio* (an isopod) shows expression in a reduced number of segments

<sup>p</sup> *Glomeris* (millipede) note only early limb expression shown; no rings at that time, but counted as no data because don't have images of more developed limbs

<sup>q</sup> *Lithobius* (centipede), early limb dev. gene exp.-no rings, but counted as no data because don't have images of more developed limbs

<sup>r</sup> Data from two ligands (not in clear rings) & receptor (ubiquitous)

<sup>s</sup> At stages shown, no clear rings of *Dl* are observed

<sup>t</sup> *Steatoda* (spider), not in multiple rings

<sup>u</sup> De Sena et al. (2013) show reiterated rings of punctate *Notch* expression at late stages of limb development; what this expression corresponds to is not discussed.

<sup>v</sup> De Sena et al. (2013) show reiterated rings of punctate *Delta* expression at late stages of limb development; what this expression corresponds to is not discussed.

**Literature Cited for Supplemental Table 1**

1. de Celis JF, Tyler DM, de Celis J, Bray SJ (1998) Notch signalling mediates segmentation of the *Drosophila* leg. *Development* 125(23):4617–4626.
2. Bishop SA, Klein T, Arias AM, Couso JP (1999) Composite signalling from *Serrate* and *Delta* establishes leg segments in *Drosophila* through *Notch*. *Development* 126(13):2993–3003.
3. Rauskolb C, Irvine KD (1999) Notch-mediated segmentation and growth control of the *Drosophila* leg. *Dev Biol* 210(2):339–350.
4. Shirai T, Yorimitsu T, Kiritooshi N, Matsuzaki F, Nakagoshi H (2007) Notch signaling relieves the joint-suppressive activity of Defective proventriculus in the *Drosophila* leg. *Dev Biol* 312(1):147–156.
5. Tajiri R, Misaki K, Yonemura S, Hayashi S (2011) Joint morphology in the insect leg: evolutionary history inferred from *Notch* loss-of-function phenotypes in *Drosophila*. *Development* 138(21):4621–4626.
6. Rauskolb C (2001) The establishment of segmentation in the *Drosophila* leg. *Development* 128(22):4511–4521.
7. Mirth C, Akam M (2002) Joint development in the *Drosophila* Leg: Cell movements and cell populations. *Dev Biol* 246(2):391–406.
8. Greenberg L, Hatini V (2009) Essential roles for *lines* in mediating leg and antennal proximodistal patterning and generating a stable Notch signaling interface at segment borders. *Dev Biol* 330(1):93–104.
9. Turchyn N, Chesebro J, Hrycaj S, Couso JP, Popadić A (2011) Evolution of *nubbin* function in hemimetabolous and holometabolous insect appendages. *Dev Biol* 357(1):83–95.
10. Hao I, Green RB, Dunaevsky O, Lengyel JA, Rauskolb C (2003) The *odd-skipped* family of zinc finger genes promotes *Drosophila* leg segmentation. *Dev Biol* 263(2):282–295.
11. Ahn Y, Zou J, Mitchell PJ (2011) Segment-specific regulation of the *Drosophila* *AP-2* gene during leg and antennal development. *Dev Biol* 355(2):336–348.
12. de Celis Ibeas JM, Bray SJ (2003) Bowl is required downstream of Notch for elaboration of distal limb patterning. *Development* 130(24):5943–5952.
13. Manjón C, Sánchez-Herrero E, Suzanne M (2007) Sharp boundaries of Dpp signalling trigger local cell death required for *Drosophila* leg morphogenesis. *Nat Cell Biol* 9(1):57–63.
14. Galindo MI, Bishop SA, Couso JP (2005) Dynamic EGFR-Ras signalling in *Drosophila* leg

- development. *Dev Dyn* 233(4):1496–1508.
15. Pueyo JI, Couso JP (2011) Tarsal-less peptides control Notch signalling through the Shavenbaby transcription factor. *Dev Biol* 355(2):183–193.
  16. Ciechanska E, Dansereau DA, Svendsen PC, Heslip TR, Brook WJ (2007) *dAP-2* and *defective proventriculus* regulate *Serrate* and *Delta* expression in the tarsus of *Drosophila melanogaster*. *Genome* 50(8):693–705.
  17. Kerber B, Monge I, Mueller M, Mitchell PJ, Cohen SM (2001) The AP-2 transcription factor is required for joint formation and cell survival in *Drosophila* leg development. *Development* 128(8):1231–1238.
  18. Monge I, et al. (2001) *Drosophila* transcription factor AP-2 in proboscis, leg and brain central complex development. *Dev Camb Engl* 128(8):1239–1252.
  19. Aranda M, Marques-Souza H, Bayer T, Tautz D (2008) The role of the segmentation gene *hairy* in *Tribolium*. *Dev Genes Evol* 218(9):465–477.
  20. Beermann A, Aranda M, Schröder R (2004) The *Sp8* zinc-finger transcription factor is involved in allometric growth of the limbs in the beetle *Tribolium castaneum*. *Development* 131(4):733–742.
  21. Siemanowski J, Richter T, Dao VA, Bucher G (2015) Notch signaling induces cell proliferation in the labrum in a regulatory network different from the thoracic legs. *Dev Biol* 408(1):164–177.
  22. Coulcher JF, Edgecombe GD, Telford MJ (2015) Molecular developmental evidence for a subcoxal origin of pleurites in insects and identity of the subcoxa in the gnathal appendages. *Sci Rep* 5:15757.
  23. Jockusch EL Personal Observation.
  24. Sanchez-Salazar J, et al. (1996) The *Tribolium decapentaplegic* gene is similar in sequence, structure, and expression to the *Drosophila dpp* gene. *Dev Genes Evol* 206(4):237–246.
  25. Ober KA, Jockusch EL (2006) The roles of *wingless* and *decapentaplegic* in axis and appendage development in the red flour beetle, *Tribolium castaneum*. *Dev Biol* 294(2):391–405.
  26. Grossmann D, Prpic N-M (2012) Egfr signaling regulates distal as well as medial fate in the embryonic leg of *Tribolium castaneum*. *Dev Biol* 370(2):264–272.
  27. Savard J, Marques-Souza H, Aranda M, Tautz D (2006) A segmentation gene in *Tribolium* produces a polycistronic mRNA that codes for multiple conserved peptides. *Cell* 126(3):559–569.
  28. Angelini DR, Smith FW, Jockusch EL (2012) Extent with modification: Leg patterning in

- the beetle *Tribolium castaneum* and the evolution of serial homologs. *G3 GenesGenomesGenetics* 2(2):235–248.
29. Angelini DR, Smith FW, Aspiras AC, Kikuchi M, Jockusch EL (2012) Patterning of the adult mandibulate mouthparts in the red flour beetle, *Tribolium castaneum*. *Genetics* 190(2):639–654.
  30. Angelini DR, Kikuchi M, Jockusch EL (2009) Genetic patterning in the adult capitata antenna of the beetle *Tribolium castaneum*. *Dev Biol* 327(1):240–251.
  31. Namigai EKO, Suzuki Y (2012) Functional conservation and divergence of BMP ligands in limb development and lipid homeostasis of holometabolous insects. *Evol Dev* 14(3):296–310.
  32. Linz DM, Tomoyasu Y (2015) RNAi screening of developmental toolkit genes: a search for novel wing genes in the red flour beetle, *Tribolium castaneum*. *Dev Genes Evol* 225(1):11–22.
  33. Mito T, et al. (2011) Ancestral functions of Delta/Notch signaling in the formation of body and leg segments in the cricket *Gryllus bimaculatus*. *Development* 138(17):3823–3833.
  34. Kainz F, Ewen-Campen B, Akam M, Extavour CG (2011) Notch/Delta signalling is not required for segment generation in the basally branching insect *Gryllus bimaculatus*. *Development* 138(22):5015–5026.
  35. Jockusch EL, Nulsen C, Newfeld SJ, Nagy LM (2000) Leg development in flies versus grasshoppers: differences in *dpp* expression do not lead to differences in the expression of downstream components of the leg patterning pathway. *Development* 127(8):1617–1626.
  36. Niwa N, et al. (2000) Correlation of diversity of leg morphology in *Gryllus bimaculatus* (cricket) with divergence in *dpp* expression pattern during leg development. *Development* 127(20):4373–4381.
  37. Nakamura T, Mito T, Miyawaki K, Ohuchi H, Noji S (2008) EGFR signaling is required for re-establishing the proximodistal axis during distal leg regeneration in the cricket *Gryllus bimaculatus* nymph. *Dev Biol* 319(1):46–55.
  38. Chesebro J (2013) Mechanisms of segmentation in the American cockroach, *Periplaneta americana*. D. Phil. Thesis (University of Sussex).
  39. Li H, Popadić A (2004) Analysis of *nubbin* expression patterns in insects. *Evol Dev* 6(5):310–324.
  40. Averof M, Cohen SM (1997) Evolutionary origin of insect wings from ancestral gills. *Nature* 385(6617):627–630.
  41. Damen WGM, Saridaki T, Averof M (2002) Diverse adaptations of an ancestral gill: a common evolutionary origin for wings, breathing organs, and spinnerets. *Curr Biol*

12(19):1711–1716.

42. Abzhanov A, Kaufman TC (2000) Homologs of *Drosophila* appendage genes in the patterning of arthropod limbs. *Dev Biol* 227(2):673–689.
43. Dove H, Stollewerk A (2003) Comparative analysis of neurogenesis in the myriapod *Glomeris marginata* (Diplopoda) suggests more similarities to chelicerates than to insects. *Development* 130(10):2161–2171.
44. Kadner D, Stollewerk A (2004) Neurogenesis in the chilopod *Lithobius forficatus* suggests more similarities to chelicerates than to insects. *Dev Genes Evol* 214(8):367–379.
45. Prpic N-M (2004) Homologs of *wingless* and *decapentaplegic* display a complex and dynamic expression profile during appendage development in the millipede *Glomeris marginata* (Myriapoda: Diplopoda). *Front Zool* 1(1):6.
46. Janssen R (2017) Gene expression reveals evidence for EGFR-dependent proximal-distal limb patterning in a myriapod. *Evol Dev* 19(3):124–135.
47. Stollewerk A (2002) Recruitment of cell groups through Delta/Notch signalling during spider neurogenesis. *Development* 129(23):5339–5348.
48. Prpic N-M, Damen WGM (2009) *Notch*-mediated segmentation of the appendages is a molecular phylotypic trait of the arthropods. *Dev Biol* 326(1):262–271.
49. Prpic N-M, Janssen R, Wigand B, Klingler M, Damen WG. (2003) Gene expression in spider appendages reveals reversal of *exd/hth* spatial specificity, altered leg gap gene dynamics, and suggests divergent distal morphogen signaling. *Dev Biol* 264(1):119–140.
50. Gaspar MAG (2012) Study of developmental genes in opisthosomal limb development in the spider *Parasteatoda tepidariorum*. M.S. Thesis (Universidade de Lisboa). Available at: <http://hdl.handle.net/10451/7476>.
51. Eriksson BJ, Stollewerk A (2010) Expression patterns of neural genes in *Euperipatoides kanangrensis* suggest divergent evolution of onychophoran and euarthropod neurogenesis. *Proc Natl Acad Sci U S A* 107(52):22576–22581.
52. de Sena Oliveira I, Tait NN, Strübing I, Mayer G (2013) The role of ventral and pre-ventral organs as attachment sites for segmental limb muscles in Onychophora. *Front Zool* 10(1):73.
53. Janssen R, Budd GE (2016) Gene expression analysis reveals that Delta/Notch signalling is not involved in onychophoran segmentation. *Dev Genes Evol* 226(2):69–77.
54. Janssen R, Budd GE (2013) Deciphering the onychophoran “segmentation gene cascade”: Gene expression reveals limited involvement of pair rule gene orthologs in segmentation, but a highly conserved segment polarity gene network. *Dev Biol* 382(1):224–234.

55. Treffkorn S, Mayer G (2013) Expression of the *decapentaplegic* ortholog in embryos of the onychophoran *Euperipatoides rowelli*. *Gene Expr Patterns* 13(8):384–394.
56. Janssen R, Jörgensen M, Prpic N-M, Budd GE (2015) Aspects of dorso-ventral and proximo-distal limb patterning in onychophorans. *Evol Dev* 17(1):21–33.
